# Supplementary material
Source: PubMed Central journal article supplement (PMC10282986)
Supplement: NIHMS1906160-supplement-supp.pdf [file NIHMS1906160-supplement-supp.pdf]

**Supplemental Table 1. List of covariates considered in the multivariable models for adult heart**

| <b>Covariate</b>                            | <b>1-year mortality model</b> | <b>5-year mortality model conditional on survival to 1 year</b> | <b>5-year CAV model conditional on survival to discharge</b> |
|---------------------------------------------|-------------------------------|-----------------------------------------------------------------|--------------------------------------------------------------|
| Recipient age (years)                       | x                             | x                                                               | x                                                            |
| Recipient BMI (kg/m <sup>2</sup> )          | x                             | x                                                               | x                                                            |
| Recipient diagnosis                         | x                             | x                                                               | x                                                            |
| Recipient diabetes                          | x                             | x                                                               | x                                                            |
| Recipient history cancer                    | x                             | x                                                               |                                                              |
| Recipient history of smoking                | x                             | x                                                               | x                                                            |
| Recipient IV inotropes                      | x                             | x                                                               | x                                                            |
| Recipient ECMO                              | x                             | x                                                               |                                                              |
| Recipient IABP                              | x                             | x                                                               |                                                              |
| Recipient ventilator                        | x                             | x                                                               | x                                                            |
| Recipient MCS type                          | x                             |                                                                 |                                                              |
| Recipient hospitalized                      | x                             | x                                                               | x                                                            |
| Recipient previous cardiac surgery          | x                             | x                                                               | x                                                            |
| Recipient PRA (%)                           | x                             | x                                                               | x                                                            |
| Recipient GFR (mL/min/1.73 m <sup>2</sup> ) | x                             | x                                                               | x                                                            |
| Recipient total bilirubin (mg/dl)           | x                             | x                                                               | x                                                            |
| Recipient PA mean (mm/Hg)                   | x                             | x                                                               | x                                                            |
| Recipient PCW (mm/Hg)                       | x                             | x                                                               |                                                              |
| Recipient PVR (wood units)                  | x                             | x                                                               | x                                                            |
| Donor age (years)                           | x                             | x                                                               | x                                                            |
| Donor cause of death                        | x                             | x                                                               | x                                                            |
| Transplant era                              | x                             | x                                                               | x                                                            |
| Donor/recipient sex match                   | x                             | x                                                               | x                                                            |
| Donor CMV+/recipient CMV-                   | x                             | x                                                               | x                                                            |
| Ischemic time (hours)                       | x                             | x                                                               | x                                                            |
| Center volume in previous 3 years           | x                             | x                                                               | x                                                            |
| Interaction of era and recipient age        | x                             | x                                                               | x                                                            |
| Interaction of era and recipient diabetes   | x                             | x                                                               | x                                                            |
| Interaction of era and recipient MCS type   | x                             |                                                                 |                                                              |
| Interaction of era and recipient PRA        | x                             | x                                                               | x                                                            |
| Interaction of era and recipient GFR        | x                             | x                                                               | x                                                            |
